# Supplementary material for: Photo Lewis acid generators: photorelease of B(C6F5)3 and applications to catalysis
Source: Royal Society of Chemistry journal article supplement (doi:10.1039/c5dt03008k), 2015-01-01
Supplement: c5dt03008k1.pdf [file c5dt03008k1.pdf]

## Supporting Information

to the article

### Photo Lewis Acid Generators: Photorelease of $B(C_6F_5)_3$ and Applications to Catalysis

by Andrey Y. Khalimon,\* Bryan K. Shaw, Adam. J. V. Marwitz, Warren E. Piers,\*  
James M. Blackwell and Masood Parvez

wpiers@ucalgary.ca  
andrey.khalimon@nu.edu.kz

#### Contents

|                                                                                                                                                                     |    |
|---------------------------------------------------------------------------------------------------------------------------------------------------------------------|----|
| Experimental details.....                                                                                                                                           | 2  |
| Thermal stability of <b>1-Ph<sub>3</sub>S</b> , <b>1-Ph<sub>2</sub>I</b> , <b>3-Ph<sub>3</sub>S</b> , <b>7-Ph<sub>3</sub>S</b> , and <b>7-Ph<sub>2</sub>I</b> ..... | 5  |
| Photolysis of PhLAGs in different solvents .....                                                                                                                    | 8  |
| Selected NMR spectra.....                                                                                                                                           | 10 |
| Catalysis by hydridoborate PhLAGs .....                                                                                                                             | 12 |
| Photophysical properties.....                                                                                                                                       | 14 |
| X-ray analysis .....                                                                                                                                                | 17 |
| References.....                                                                                                                                                     | 20 |

## Experimental details

An argon filled MBraun glove box was employed for manipulation and storage of all oxygen and moisture sensitive compounds. All reactions were performed on a double manifold high vacuum line using standard techniques.<sup>1</sup> Toluene and hexanes were dried and purified using the Grubbs/Dow purification system.<sup>2</sup> Other solvents as well as NMR solvents were dried by distillation from appropriate drying agents. NMR spectra were obtained using Bruker AVANCE III 400 MHz and AVANCE III 600 MHz spectrometers. <sup>1</sup>H and <sup>13</sup>C chemical shifts were referenced to residual proton and naturally abundant <sup>13</sup>C resonance of the deuterated solvent, respectively. <sup>19</sup>F NMR spectra were externally referenced to C<sub>6</sub>F<sub>6</sub> ( $\delta$  -163.0 ppm) in C<sub>6</sub>D<sub>6</sub>.<sup>3</sup> <sup>11</sup>B NMR spectra were externally referenced to BF<sub>3</sub>OEt<sub>2</sub> ( $\delta$  0 ppm) in d<sub>6</sub>-DMSO. IR spectra were recorded in nujol using Nicolet Nexus 470 FT-IR spectrometer. UV-vis spectra were obtained with a Varian Cary 300 spectrometer using 1 cm quartz cuvettes. All UV-vis samples were prepared in a glove box using dry CH<sub>2</sub>Cl<sub>2</sub>. TGA/DSC analysis was performed using NETZSCH STA 409 PC/PG instrument. GC-MS analysis was obtained using an Agilent Technologies 6890N GC equipped with a 5975 mass detection unit. X-ray crystallographic analyses were performed on suitable crystals coated in Paratone 8277 oil (Exxon) and mounted on a glass fibre. Measurements were collected on a Nonius KappaCCD diffractometer by Dr. Masood Parvez; full details can be found in the independently deposited crystallography information files (cif). Tris(pentafluorophenyl)borane, B(C<sub>6</sub>F<sub>5</sub>)<sub>3</sub> was sublimed at 65 °C under high dynamic vacuum, dried over Me<sub>2</sub>Si(H)Cl for 4 h and re-sublimed under the same conditions after vacuum removal of volatiles. [Ph<sub>3</sub>S][Cl] and [Ph<sub>2</sub>I][Cl] were purchased from Sigma-Aldrich and used without further purification. Et<sub>3</sub>SiH and 2,2,6,6-tetramethylpiperidine were purchased from TCI America and Sigma Aldrich, respectively. The silane was dried over and distilled from fresh LiAlH<sub>4</sub> while the amine was dried over and distilled from activated 4Å molecular sieves. Dry carbon dioxide, grade 3.0, was obtained from Praxair and used as received. Preparation, properties and reactivity of **1-Ph<sub>3</sub>S** were reported previously.<sup>4</sup> (Me<sub>4</sub>C<sub>5</sub>N)CO<sub>2</sub>Li (**4**)<sup>5</sup> and [K][HB(C<sub>6</sub>F<sub>5</sub>)<sub>3</sub>] (**7-K**)<sup>6</sup> were synthesized according to literature procedures. **3-TMPH** was described previously.<sup>7</sup>

### **Decomposition of 1-Ph<sub>2</sub>I to B(C<sub>6</sub>F<sub>5</sub>)<sub>3</sub> under ambient light**

CD<sub>3</sub>CN (65.3 μL, 1.25 mmol) was added to a solution of **1-Ph<sub>2</sub>I** (1.4 mg, 1.25×10<sup>-3</sup> mmol) in 534.7 μL of CD<sub>2</sub>Cl<sub>2</sub> in a quartz NMR tube ([**1-Ph<sub>2</sub>I**]<sub>total</sub> = 2.1×10<sup>-3</sup> mol/L). No reaction was observed in dark within 30 min at room temperature. The sample was exposed to the ambient light at room temperature for 17.5 hours, followed by the NMR analysis which showed formation of a mixture of CD<sub>3</sub>CN•B(C<sub>6</sub>F<sub>5</sub>)<sub>3</sub> (41% by <sup>19</sup>F{<sup>1</sup>H} NMR) and another unknown decomposition product (29% by <sup>19</sup>F{<sup>1</sup>H} NMR) with 70% total conversion of **1-Ph<sub>2</sub>I**. In the absence of acetonitrile no formation of B(C<sub>6</sub>F<sub>5</sub>)<sub>3</sub> from **1-Ph<sub>2</sub>I** under ambient light was observed. Only slow (3 weeks to approx. 50% conversion) decomposition of **1-Ph<sub>2</sub>I** to a mixture of unknown products was observed by NMR.

### **Decomposition of 1-Ph<sub>2</sub>I at room temperature in dark**

A solution of **1-Ph<sub>2</sub>I** (10 mg, 9.0×10<sup>-3</sup> mmol) in 0.6 mL of CD<sub>2</sub>Cl<sub>2</sub> in an NMR tube was left at room temperature in dark for 24 h. NMR analysis showed approx. 37% conversion of **1-Ph<sub>2</sub>I** to a mixture of unknown decomposition products. No B(C<sub>6</sub>F<sub>5</sub>)<sub>3</sub> was observed by NMR.

### **Reactivity of 5 with <sup>13</sup>CO<sub>2</sub>, TMP and B(*p*-C<sub>6</sub>F<sub>4</sub>H)<sub>3</sub>**

**A. Treatment of 5 with <sup>13</sup>CO<sub>2</sub>.** <sup>13</sup>CO<sub>2</sub> (approx. 2.0 atm) was added *via* vacuum transfer to a solution of **5** (5.0 mg, 0.0072 mmol) in 0.5 mL of CD<sub>2</sub>Cl<sub>2</sub> in a J. Young NMR tube. The reaction mixture was left at room temperature for 4 hours showing by <sup>13</sup>C NMR spectroscopy no incorporation of <sup>13</sup>C label into a carbonyl carbon position of **5**.

**B. Treatment of 5 with TMP.** TMP (2.0 μL, 0.012 mmol) was added in one portion at room temperature to a solution of **5** from part A (after the release of <sup>13</sup>CO<sub>2</sub> pressure). The mixture was left at room temperature for 5 min and then analysed by NMR spectroscopy, which showed full conversion of **5** to **3-TMPH**.

**C. Treatment of 5 with B(*p*-C<sub>6</sub>F<sub>4</sub>H)<sub>3</sub>.** A solution of **5** (5.0 mg, 0.0072 mmol) in 0.5 mL of CD<sub>2</sub>Cl<sub>2</sub> was added in one portion at room temperature to B(*p*-C<sub>6</sub>F<sub>4</sub>H)<sub>3</sub> (3.5 mg, 0.0076 mmol). The mixture was left at room temperature for 1h showing by <sup>19</sup>F{<sup>1</sup>H} NMR spectroscopy no release of B(C<sub>6</sub>F<sub>5</sub>)<sub>3</sub> and no incorporation of B(*p*-C<sub>6</sub>F<sub>4</sub>H)<sub>3</sub> into **5**.

**Attempted photoinduced hydrosilylation of PhC(O)Me with Et<sub>3</sub>SiH in the presence of 3-Ph<sub>3</sub>S.**

**A:** Acetophenone (17.5 μL, 0.15 mmol), Et<sub>3</sub>SiH (24.0 μL, 0.15 mmol), and **3-Ph<sub>3</sub>S** (1.4 mg, 0.0015 mmol) were mixed together in 0.5 mL of CD<sub>2</sub>Cl<sub>2</sub> in a quartz NMR tube. The mixture was left at room temperature and ambient light for 30 min showing by NMR spectroscopy no reaction. The sample was exposed to 254 nm light for 30 min showing no hydrosilylation reaction occurring.

**B: Reaction in the presence of acetonitrile.** Acetophenone (17.5 μL, 0.15 mmol), Et<sub>3</sub>SiH (24.0 μL, 0.15 mmol), **3-Ph<sub>3</sub>S** (1.4 mg, 0.0015 mmol), and CH<sub>3</sub>CN (0.1 μL, 0.0019 mmol) were mixed together in 0.5 mL of CD<sub>2</sub>Cl<sub>2</sub> in a quartz NMR tube. The mixture was left at room temperature and ambient light for 30 min showing by NMR spectroscopy no reaction. The sample was exposed to 254 nm light for 30 min showing no hydrosilylation reaction occurring.

**Decomposition of 7-Ph<sub>3</sub>S under ambient light.**

A solution of **7-Ph<sub>3</sub>S** in CD<sub>3</sub>CN (2.1·10<sup>-3</sup> mol/L) was placed into a quartz NMR tube. The mixture was left at room temperature and ambient light for 96 hours and then analysed by NMR spectroscopy, which showed 14% conversion (by <sup>19</sup>F NMR) of **7-Ph<sub>3</sub>S** to CD<sub>3</sub>CN·B(C<sub>6</sub>F<sub>5</sub>)<sub>3</sub>.

**Decomposition of 7-Ph<sub>2</sub>I under ambient light.**

The reaction was done analogously to 7-Ph<sub>3</sub>S. Exposure of the sample of **7-Ph<sub>2</sub>I** in CD<sub>3</sub>CN (2.1·10<sup>-3</sup> mol/L) to ambient light for 96 hours resulted in full conversion (by <sup>19</sup>F NMR) of **7-Ph<sub>2</sub>I** to CD<sub>3</sub>CN·B(C<sub>6</sub>F<sub>5</sub>)<sub>3</sub>.

## Thermal stability of 1-Ph<sub>3</sub>S, 1-Ph<sub>2</sub>I, 3-Ph<sub>3</sub>S, 7-Ph<sub>3</sub>S, and 7-Ph<sub>2</sub>I

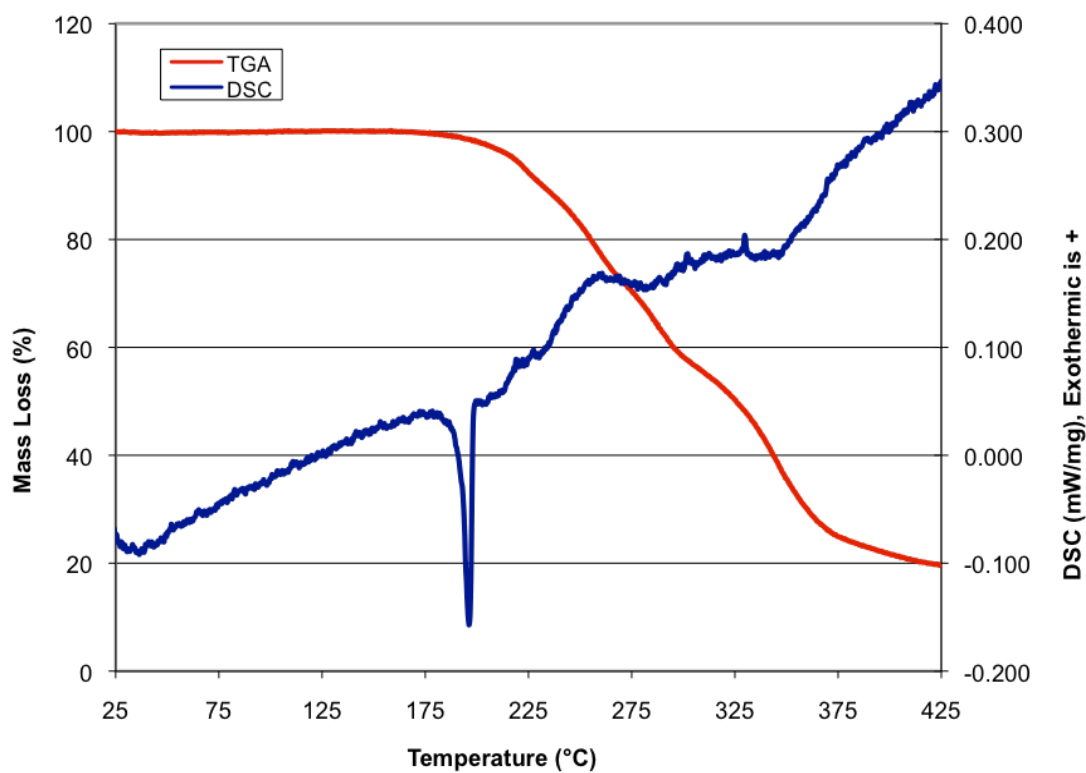

Figure S1. TGA/DSC diagram for 1-Ph<sub>3</sub>S.<sup>4</sup>

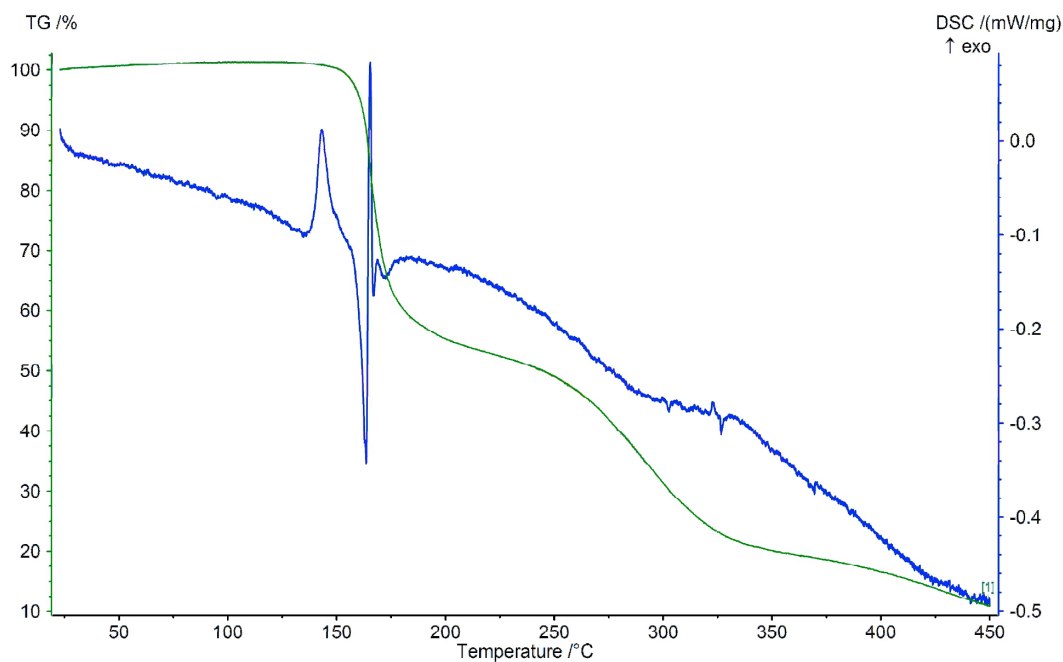

Figure S2. TGA/DSC diagram for 1-Ph<sub>2</sub>I.

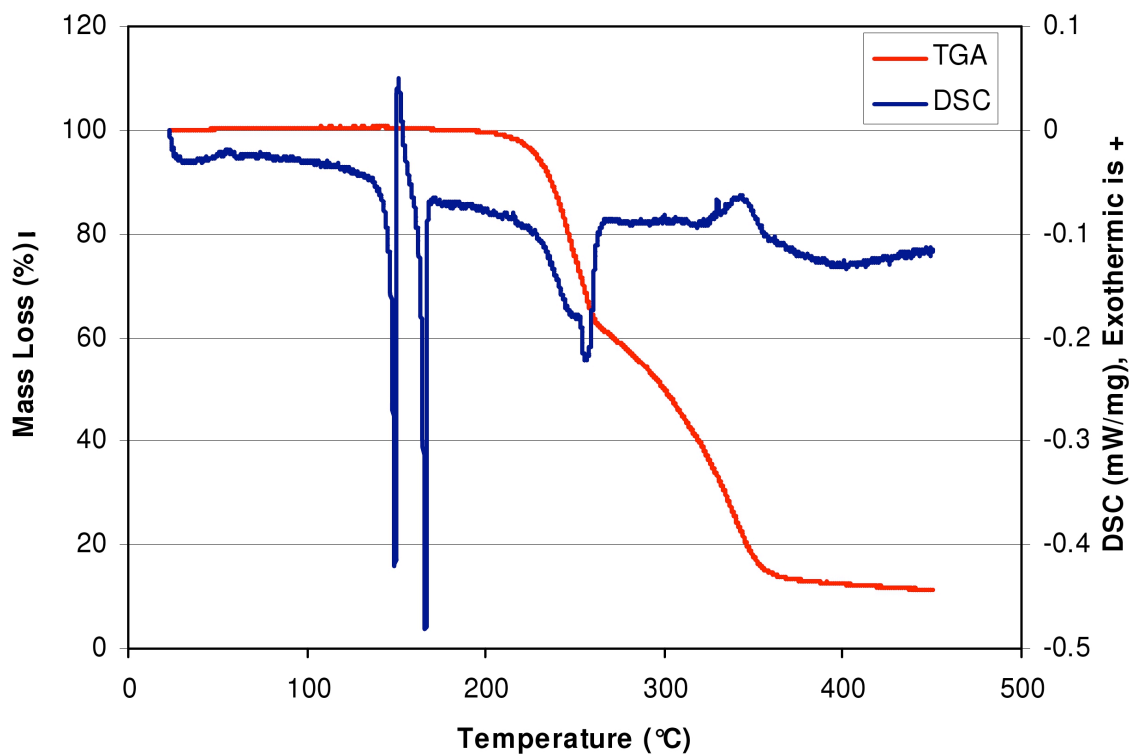

**Figure S3.** TGA/DSC diagram for **3-Ph<sub>3</sub>S**

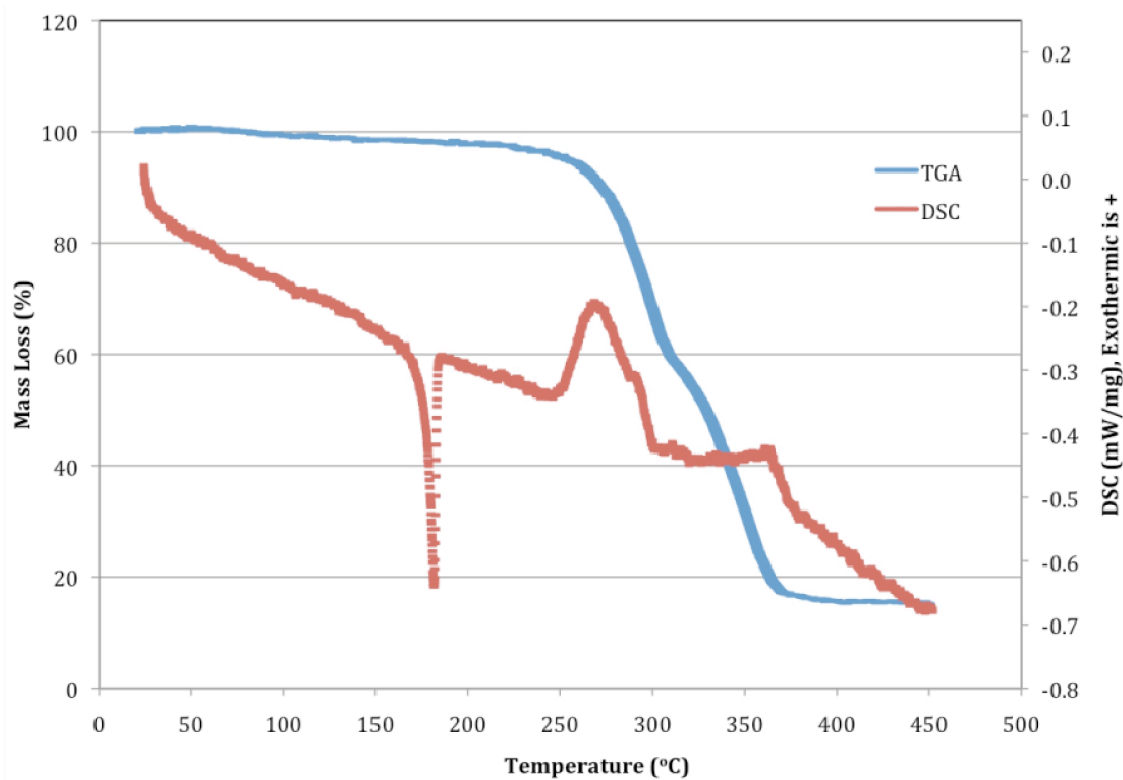

**Figure S4.** TGA/DSC diagram for **7-Ph<sub>3</sub>S**.

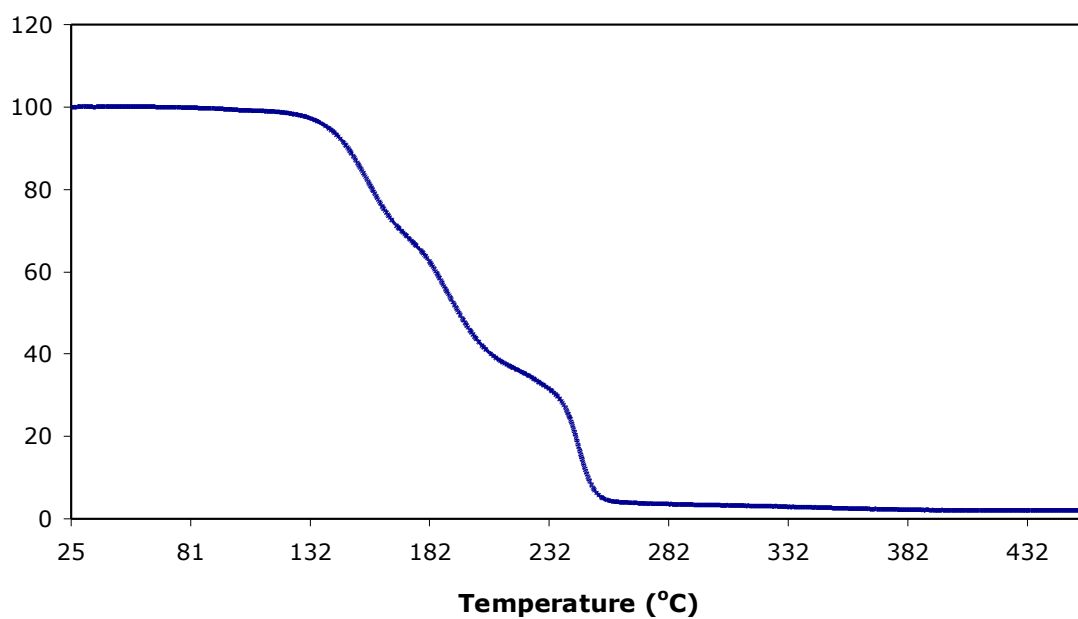

**Figure S5.** TGA diagram for 7-Ph<sub>2</sub>I.

## Photolysis of PhLAGs in different solvents

**Table S1.** Photodecomposition of **1-Ph<sub>3</sub>S**, **1-Ph<sub>2</sub>I**, **3-Ph<sub>3</sub>S**, **7-Ph<sub>3</sub>S**, and **7-Ph<sub>2</sub>I** in different solvents.

| # | Comp.                                 | Conc., mol/L        | Solvent                                                     | $t_{\text{irr}}$ , min | Conv. <sup>a</sup> | $k_{\text{obs}}$ , s <sup>-1</sup> |
|---|---------------------------------------|---------------------|-------------------------------------------------------------|------------------------|--------------------|------------------------------------|
| 1 | <b>1-Ph<sub>3</sub>S</b> <sup>4</sup> | $2.1 \cdot 10^{-3}$ | CD <sub>3</sub> CN                                          | 12                     | 58%                | $(1.4 \pm 0.3) \cdot 10^{-3b}$     |
| 2 | <b>1-Ph<sub>3</sub>S</b> <sup>4</sup> | $2.0 \cdot 10^{-3}$ | CD <sub>2</sub> Cl <sub>2</sub> /CD <sub>3</sub> CN (1/4)   | 8                      | 74%                | $(2.7 \pm 0.4) \cdot 10^{-3}$      |
| 3 | <b>1-Ph<sub>3</sub>S</b> <sup>4</sup> | $2.1 \cdot 10^{-3}$ | CD <sub>2</sub> Cl <sub>2</sub> /CD <sub>3</sub> CN (8.7/1) | 12                     | >99%               | $(3.3 \pm 0.3) \cdot 10^{-3}$      |
| 4 | <b>1-Ph<sub>2</sub>I</b>              | $2.1 \cdot 10^{-3}$ | CD <sub>2</sub> Cl <sub>2</sub> /CD <sub>3</sub> CN (8.7/1) | 12                     | >99%               | $(4.4 \pm 0.1) \cdot 10^{-3}$      |
| 5 | <b>3-Ph<sub>3</sub>S</b>              | $2.1 \cdot 10^{-3}$ | CD <sub>3</sub> CN                                          | 13                     | 46%                | $(1.0 \pm 0.4) \cdot 10^{-3}$      |
| 6 | <b>7-Ph<sub>3</sub>S</b>              | $2.1 \cdot 10^{-3}$ | CD <sub>3</sub> CN                                          | 12                     | 81%                | $(2.3 \pm 0.2) \cdot 10^{-3}$      |
| 7 | <b>7-Ph<sub>2</sub>I</b>              | $2.1 \cdot 10^{-3}$ | CD <sub>3</sub> CN                                          | 12                     | >99%               | — <sup>c</sup>                     |

<sup>a</sup> determined by <sup>1</sup>H NMR. <sup>b</sup> determined at 50% conversion of **1-Ph<sub>3</sub>S**. <sup>c</sup>  $k_{\text{obs}}$  was not determined.



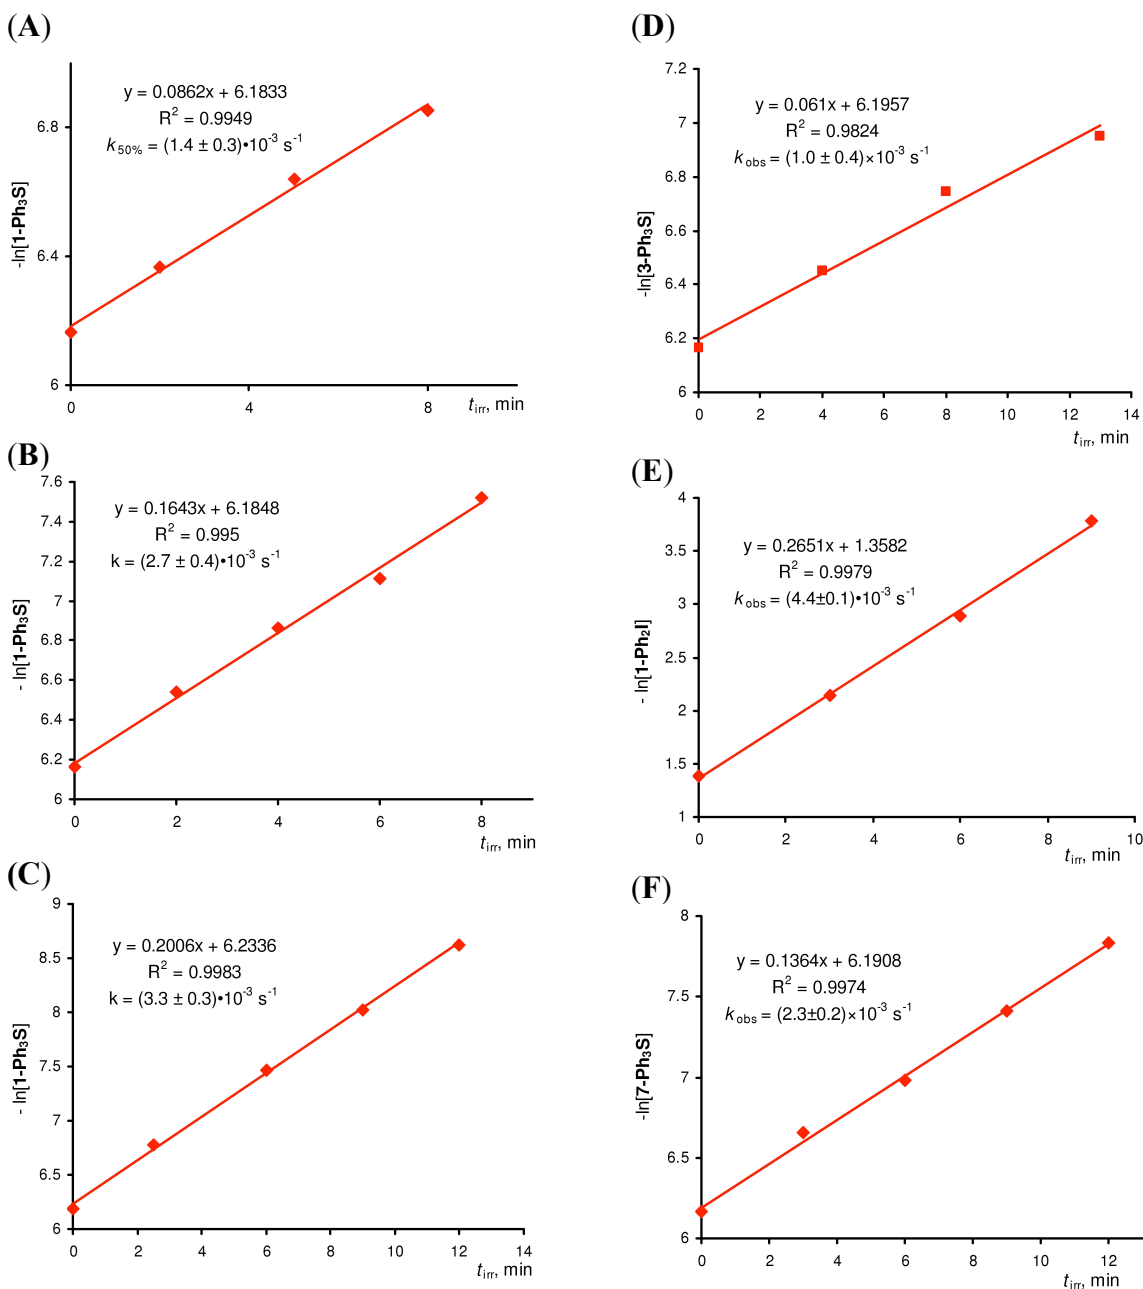

**Figure S6.** (A): kinetic profile for decomposition of **1-Ph<sub>3</sub>S** in CD<sub>3</sub>CN (2.1·10<sup>-3</sup> mol/L) to CD<sub>3</sub>CN·B(C<sub>6</sub>F<sub>5</sub>)<sub>3</sub> under 254 nm light; (B): kinetic profile for decomposition of **1-Ph<sub>3</sub>S** in CD<sub>2</sub>Cl<sub>2</sub>/CD<sub>3</sub>CN (1/4) (2.0·10<sup>-3</sup> mol/L) to CD<sub>3</sub>CN·B(C<sub>6</sub>F<sub>5</sub>)<sub>3</sub> under 254 nm light. (C): kinetic profile for decomposition of **1-Ph<sub>3</sub>S** in CD<sub>2</sub>Cl<sub>2</sub>/CD<sub>3</sub>CN (8.7/1) (2.1·10<sup>-3</sup> mol/L) to CD<sub>3</sub>CN·B(C<sub>6</sub>F<sub>5</sub>)<sub>3</sub> under 254 nm light; (D): kinetic profile for decomposition of **3-Ph<sub>3</sub>S** in CD<sub>3</sub>CN (2.1·10<sup>-3</sup> mol/L) to CD<sub>3</sub>CN·B(C<sub>6</sub>F<sub>5</sub>)<sub>3</sub> under 254 nm light; (E): kinetic profile for decomposition of **1-Ph<sub>2</sub>I** in CD<sub>2</sub>Cl<sub>2</sub>/CD<sub>3</sub>CN (8.7/1) (2.1·10<sup>-3</sup> mol/L) to CD<sub>3</sub>CN·B(C<sub>6</sub>F<sub>5</sub>)<sub>3</sub> under 254 nm light; (F): kinetic profile for decomposition of **7-Ph<sub>3</sub>S** in CD<sub>3</sub>CN (2.1·10<sup>-3</sup> mol/L) to CD<sub>3</sub>CN·B(C<sub>6</sub>F<sub>5</sub>)<sub>3</sub> under 254 nm light.

## NMR spectra

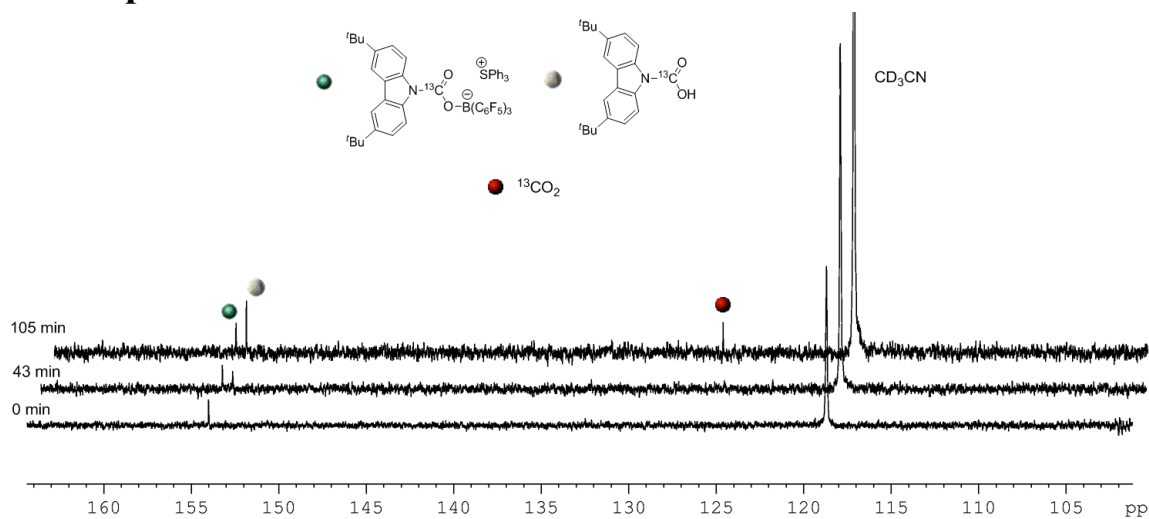

**Figure S7.** <sup>13</sup>C NMR spectra of the decomposition of **1-Ph<sub>3</sub>S-<sup>13</sup>C** under 254 nm in CD<sub>3</sub>CN (4.5·10<sup>-3</sup> mol/L). Signals at δ 154.0, 153.4, and 126.2 ppm correspond to carbonyl carbons of **1-Ph<sub>3</sub>S-<sup>13</sup>C**, <sup>t</sup>Bu<sub>2</sub>Cab<sup>13</sup>CO<sub>2</sub>H, and <sup>13</sup>CO<sub>2</sub>, respectively.<sup>4</sup>

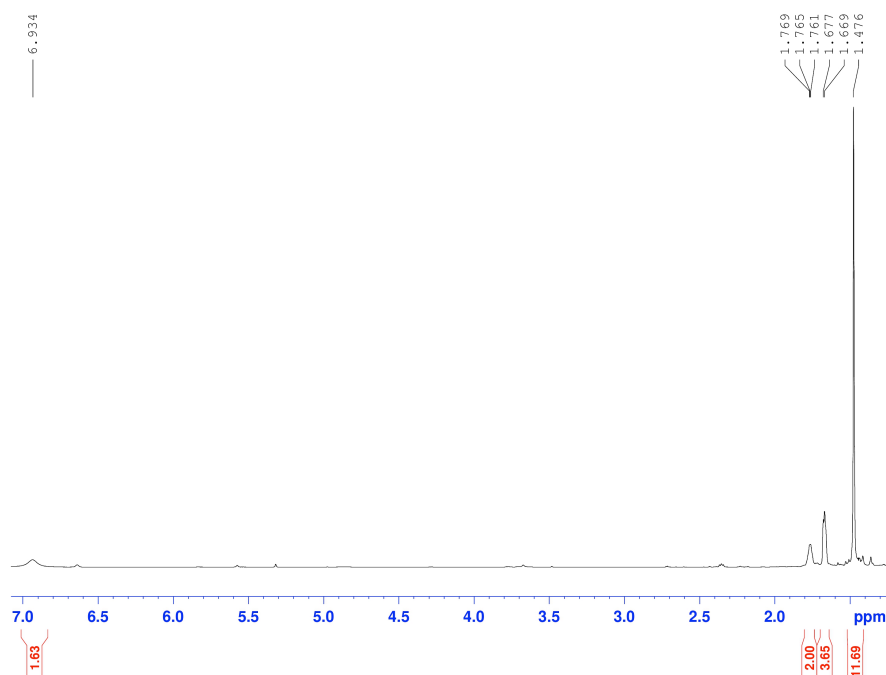

**Figure S8.** <sup>1</sup>H NMR spectrum of **5**. The broad resonance at δ 6.93 ppm corresponds to the *N*-bound proton.

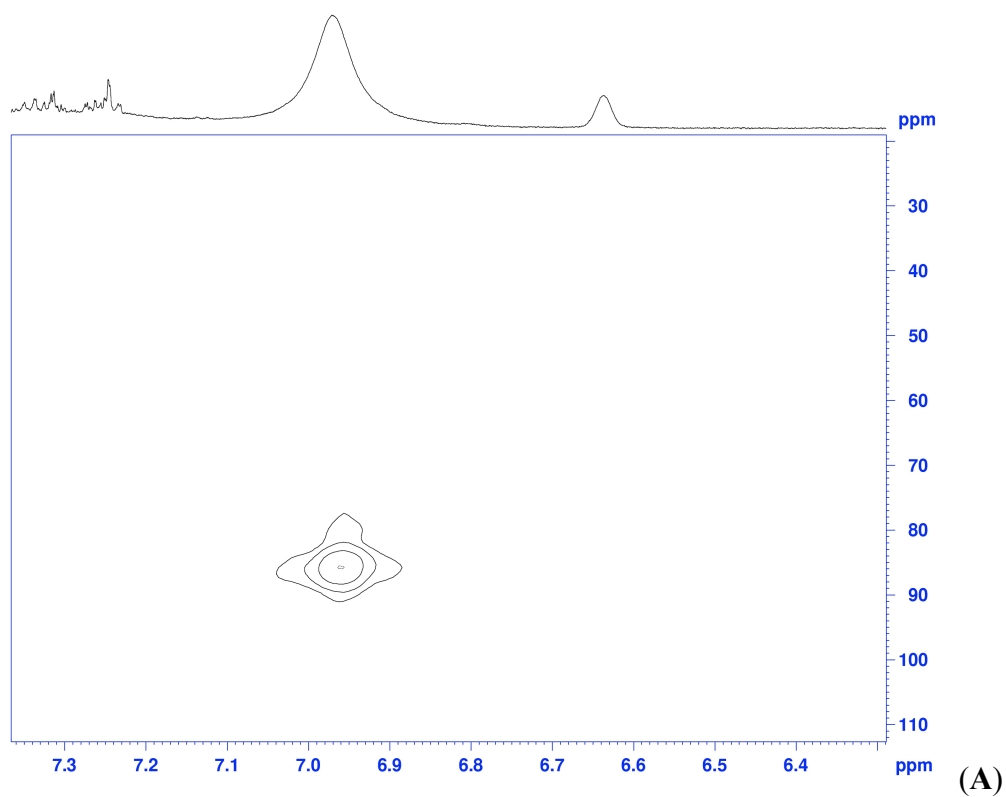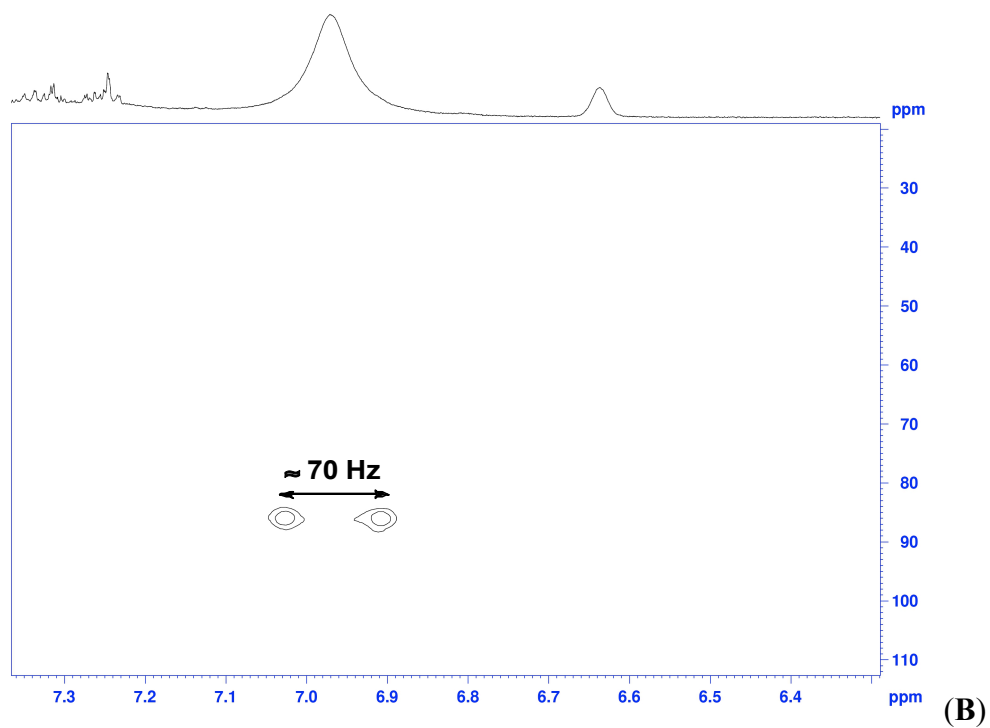

**Figure S9.**  $^1\text{H}$ - $^{15}\text{N}$  HMQC NMR (A) and  $^1\text{H}$ - $^{15}\text{N}$  HMQCND (no decoupling) NMR (B) spectra of **5** in  $\text{CD}_2\text{Cl}_2$  showing coupling for  $N$ -bound proton ( $^1J(\text{N-H}) \approx 70 \text{ Hz}$ ).

## Catalysis by hydridoborate PhLAGs

**Table S2.** Photoinduced hydrosilylation with Et<sub>3</sub>SiH and **7-Ph<sub>3</sub>S** and **7-Ph<sub>2</sub>I**<sup>a</sup>

| #  | Substrate         | PhLAG                    | <i>t</i> <sub>hv</sub> , min <sup>b</sup> | Conv., % <sup>c</sup> | Products                                                                                            |
|----|-------------------|--------------------------|-------------------------------------------|-----------------------|-----------------------------------------------------------------------------------------------------|
| 1  | PhMeC(O)          | <b>7-Ph<sub>3</sub>S</b> | 15                                        | >99                   | PhMeCH(OSiEt <sub>3</sub> )                                                                         |
| 2  |                   | <b>7-Ph<sub>2</sub>I</b> | 10                                        | >99                   |                                                                                                     |
| 4  | PhHC(O)           | <b>7-Ph<sub>3</sub>S</b> | 15                                        | 90                    | PhCH <sub>2</sub> (OSiEt <sub>3</sub> )                                                             |
| 5  |                   | <b>7-Ph<sub>2</sub>I</b> | 10                                        | >99                   |                                                                                                     |
| 7  | Cyclohex-2-enone  | <b>7-Ph<sub>3</sub>S</b> | 10                                        | >99                   |                  |
| 8  |                   | <b>7-Ph<sub>2</sub>I</b> | 5                                         | >99                   |                                                                                                     |
| 10 | PhOH              | <b>7-Ph<sub>3</sub>S</b> | 5                                         | >99                   | PhOSiEt <sub>3</sub>                                                                                |
| 11 |                   | <b>7-Ph<sub>2</sub>I</b> | 5                                         | >99                   |                                                                                                     |
| 13 | Et <sub>2</sub> O | <b>7-Ph<sub>3</sub>S</b> | 10 <sup>d</sup>                           | >99                   | Et <sub>3</sub> SiOEt (86%) <sup>e</sup><br>Et <sub>3</sub> SiOSiEt <sub>3</sub> (12%) <sup>e</sup> |
| 14 |                   | <b>7-Ph<sub>2</sub>I</b> | 10 <sup>d</sup>                           | >99                   | Et <sub>3</sub> SiOEt (91%) <sup>e</sup><br>Et <sub>3</sub> SiOSiEt <sub>3</sub> (9%) <sup>e</sup>  |

<sup>a</sup> Conditions: [substrate] = 0.25 M, 1.0 mol % of PhLAG, substrate:Et<sub>3</sub>SiH = 1:1, CD<sub>2</sub>Cl<sub>2</sub> (solvent). <sup>b</sup> Time sample was irradiated at 254 nm. <sup>c</sup> Conversion of substrate determined by <sup>1</sup>H NMR. <sup>d</sup> Sample was left for 2 h at RT in the absence of light following irradiation. <sup>e</sup> Conversion determined by GC-MS.

**Table S3.** Photoinduced silylation of silanols and Piers-Rubinsztajn reactions with **7-Ph<sub>3</sub>S** and **7-Ph<sub>2</sub>I**<sup>a</sup>

| #  | Substrate             | Hydrosilane         | PhLAG                    | <i>t<sub>hv</sub></i> / <i>t<sub>RT</sub></i> | Products (yield, %)                                                                                                                                                                                                                                                                                                                  |
|----|-----------------------|---------------------|--------------------------|-----------------------------------------------|--------------------------------------------------------------------------------------------------------------------------------------------------------------------------------------------------------------------------------------------------------------------------------------------------------------------------------------|
| 1  | Me <sub>3</sub> SiOH  | Et <sub>3</sub> SiH | <b>7-Ph<sub>3</sub>S</b> | 15 min/2 h                                    | Me <sub>3</sub> Si(OSiEt <sub>3</sub> ) (>99) <sup>b</sup>                                                                                                                                                                                                                                                                           |
| 2  |                       |                     | <b>7-Ph<sub>2</sub>I</b> |                                               |                                                                                                                                                                                                                                                                                                                                      |
| 4  | Me <sub>3</sub> SiOEt | Et <sub>3</sub> SiH | <b>7-Ph<sub>3</sub>S</b> | 15 min/48 h                                   | Et <sub>3</sub> SiOEt (2) <sup>c</sup><br>Me <sub>3</sub> Si(OSiEt <sub>3</sub> ) (37) <sup>c</sup><br>Et <sub>3</sub> Si(OSiEt <sub>3</sub> ) (60) <sup>c</sup><br>Et <sub>3</sub> SiOEt (1) <sup>c</sup><br>Me <sub>3</sub> Si(OSiEt <sub>3</sub> ) (47) <sup>c</sup><br>Et <sub>3</sub> Si(OSiEt <sub>3</sub> ) (49) <sup>c</sup> |
| 5  |                       |                     | <b>7-Ph<sub>2</sub>I</b> |                                               |                                                                                                                                                                                                                                                                                                                                      |
| 7  | Me <sub>3</sub> SiOEt | PMHS                | <b>7-Ph<sub>3</sub>S</b> | 15 min/10 min                                 | (MeHSiO) <sub>x</sub> (MeSi(OSiMe <sub>3</sub> )O) <sub>y</sub> (>99) <sup>b</sup>                                                                                                                                                                                                                                                   |
| 8  |                       |                     | <b>7-Ph<sub>2</sub>I</b> |                                               |                                                                                                                                                                                                                                                                                                                                      |
| 10 | Si(OMe) <sub>4</sub>  | TMCTS <sup>d</sup>  | <b>7-Ph<sub>3</sub>S</b> | 15 min/5 min                                  | Tetra(trimethoxysiloxy)TMCTS (99)                                                                                                                                                                                                                                                                                                    |
| 11 |                       |                     | <b>7-Ph<sub>2</sub>I</b> |                                               |                                                                                                                                                                                                                                                                                                                                      |

<sup>a</sup> Conditions: [substrate] = 0.25 M, 1.0 mol % of PhLAG, substrate:hydrosilane = 1:1, 254 nm, CD<sub>2</sub>Cl<sub>2</sub> (solvent). <sup>b</sup> Conversion determined by <sup>1</sup>H NMR spectroscopy. <sup>c</sup> Conversion determined by GC-MS. <sup>d</sup> TMCTS - 2,4,6,8-tetramethylcyclotetrasiloxane, Si(OMe)<sub>4</sub>/TMCTS = 4:1.

## Photophysical properties

**Table S4.** The values of  $\lambda_{\max}$  (nm) and  $\varepsilon$  ( $10^3 \cdot \text{M}^{-1} \cdot \text{cm}^{-1}$ ) for  $[\text{Ph}_3\text{S}][\text{OTf}]$ , 3,6-di-(*t*-butyl)carbazole, lithium borate **4**, and PhLAGs **5**, **6**, **10**, **11**, **12**, **18**, **19**, and **21** summarized in **Table 1**.

| Compound                              | Concentration, mol/L | $\lambda_{\max}$ , nm | $\varepsilon$ , $\times 10^3 \cdot \text{M}^{-1} \cdot \text{cm}^{-1}$ |
|---------------------------------------|----------------------|-----------------------|------------------------------------------------------------------------|
| $[\text{Ph}_3\text{S}][\text{OTf}]$   | $1.1 \cdot 10^{-5}$  | 242                   | 12.75                                                                  |
| $t\text{Bu}_2\text{CarbH}^4$          | $1.1 \cdot 10^{-5}$  | 238                   | 40.08                                                                  |
| <b>2-LiMTEDA</b> <sup>4</sup>         | $1.1 \cdot 10^{-5}$  | 233                   | 44.18                                                                  |
| <b>1-Ph<sub>3</sub>S</b> <sup>4</sup> | $1.1 \cdot 10^{-5}$  | 234                   | 77.84                                                                  |
| <b>7-Ph<sub>3</sub>S</b>              | $1.0 \cdot 10^{-5}$  | 228                   | 59.34                                                                  |
| <b>3-Ph<sub>3</sub>S</b>              | $1.1 \cdot 10^{-5}$  | 228                   | 23.66                                                                  |
| <b>1-Ph<sub>2</sub>I</b>              | $1.1 \cdot 10^{-5}$  | 234                   | 88.04                                                                  |
| <b>7-Ph<sub>2</sub>I</b>              | $1.1 \cdot 10^{-5}$  | 226                   | 28.64                                                                  |

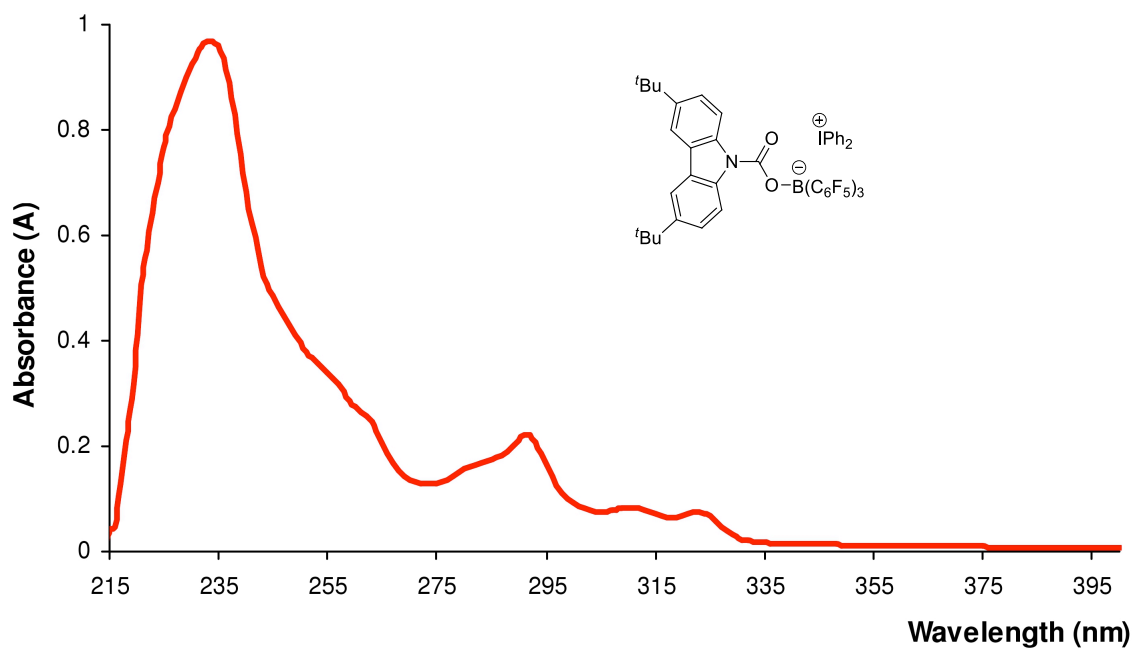

**Figure S11.** UV-vis spectrum of **1-Ph<sub>2</sub>I** in CH<sub>2</sub>Cl<sub>2</sub> (1.1 · 10<sup>-5</sup> mol/L).

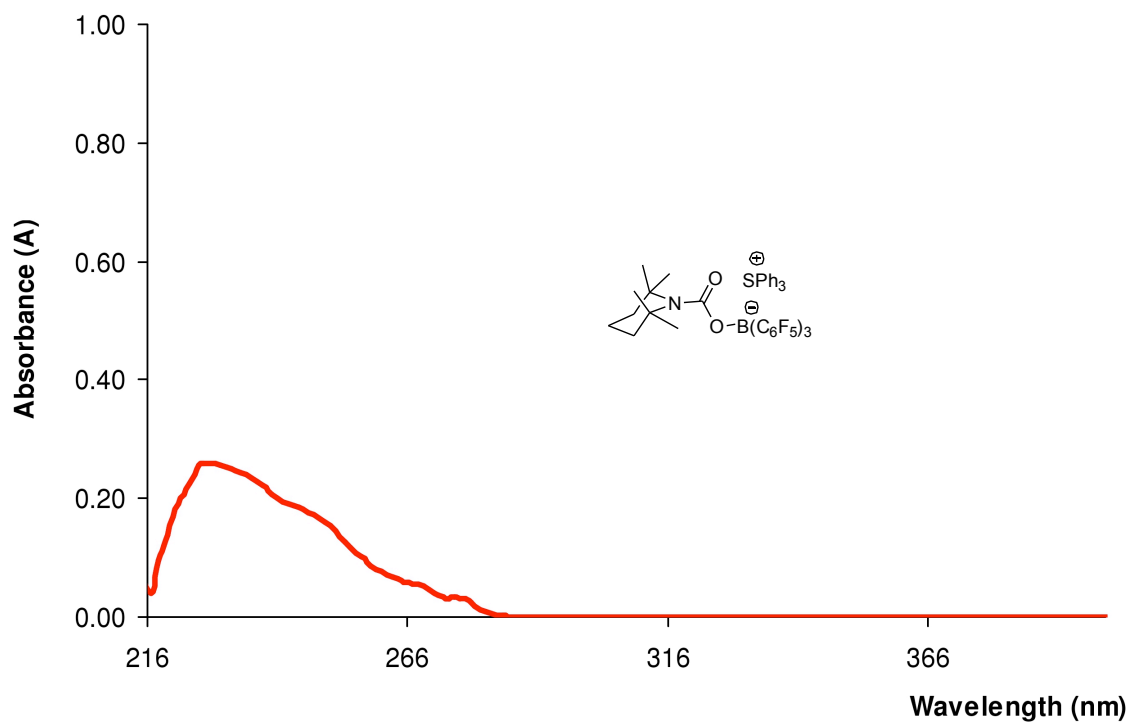

**Figure S12.** UV-vis spectrum of **3-Ph<sub>3</sub>S** in CH<sub>2</sub>Cl<sub>2</sub> (1.1 · 10<sup>-5</sup> mol/L).

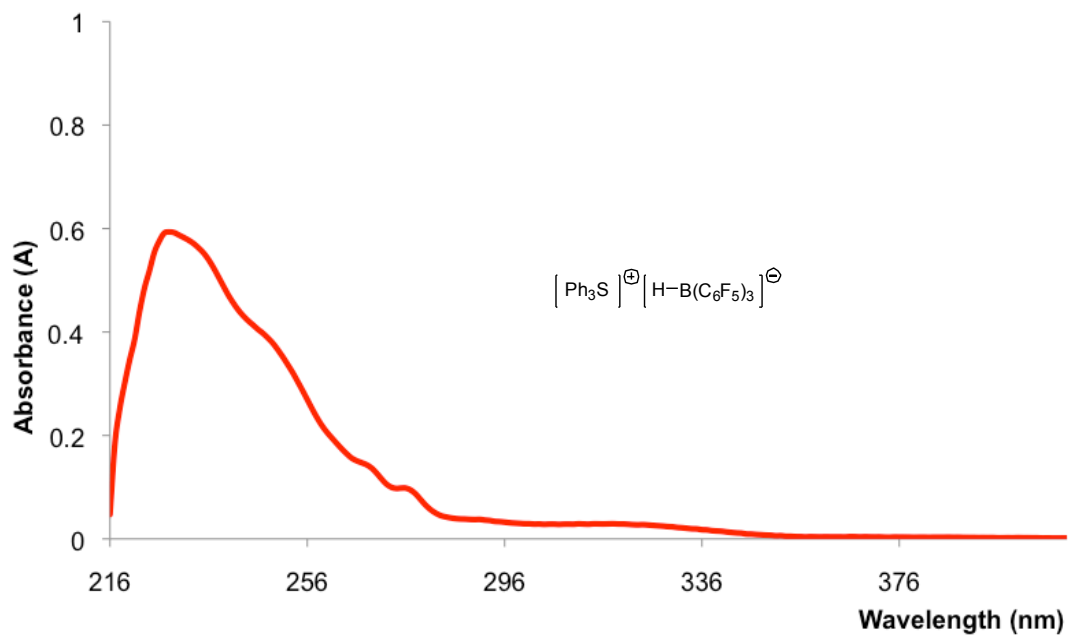

**Figure S13.** UV-vis spectrum of **7-Ph<sub>3</sub>S** in CH<sub>2</sub>Cl<sub>2</sub> ( $1.1 \cdot 10^{-5}$  mol/L).

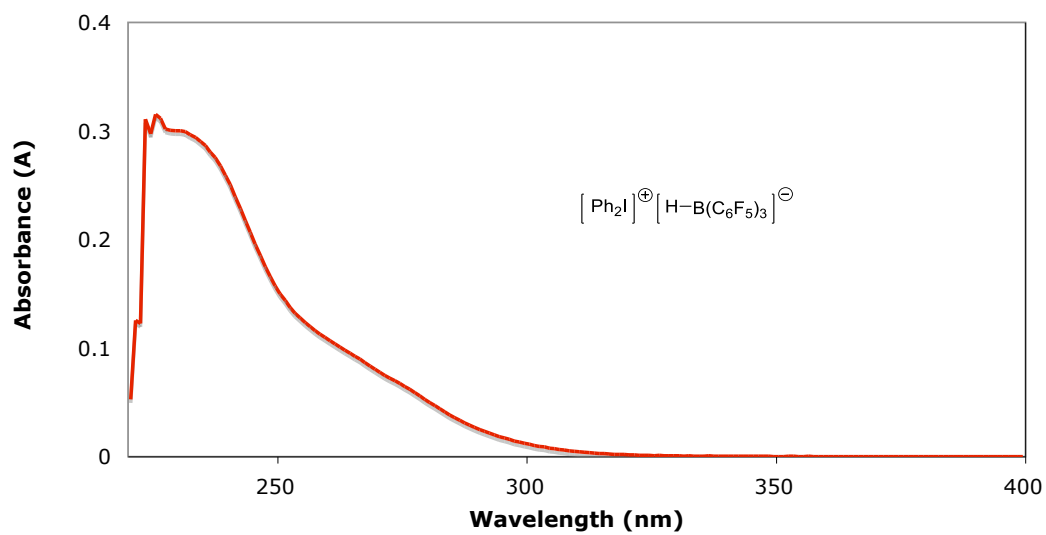

**Figure S14.** UV-vis spectrum of **7-Ph<sub>2</sub>I** in CH<sub>2</sub>Cl<sub>2</sub> ( $1.1 \cdot 10^{-5}$  mol/L).



## **X-ray analysis**

Single crystals of **3-Ph<sub>3</sub>S** suitable for X-ray diffraction analysis were grown by layering toluene solution with hexanes (approx. 1:1) at -30 °C. X-ray quality crystals of **7-Ph<sub>2</sub>I** were obtained by layering dichloromethane solution with hexanes (approx. 1:1) at -20 °C. The colorless crystals were coated with polyperfluoro oil and measured on a Bruker Nonius APEX2 CCD diffractometer, using graphite-monochromated Mo K $\alpha$  radiation ( $\lambda = 0.71073 \text{ \AA}$ ). Data collection and structure refinement details **3-Ph<sub>3</sub>S** and **7-Ph<sub>2</sub>I** are given in Tables S7 and S8, respectively. Structures of **3-Ph<sub>3</sub>S** and **7-Ph<sub>2</sub>I** are shown in Figures 1 and 2 in the main text, respectively.

**Table S7.** Data collection and structure refinement details for **3-Ph<sub>3</sub>S**.

|                                               |                                                                    |
|-----------------------------------------------|--------------------------------------------------------------------|
| formula                                       | C <sub>46</sub> H <sub>33</sub> BF <sub>15</sub> NO <sub>2</sub> S |
| formula weight                                | 959.60                                                             |
| color                                         | colorless                                                          |
| crystal system                                | monoclinic                                                         |
| space group                                   | <i>P2(1)/n</i>                                                     |
| radiation wavelength, Å                       | 0.71073                                                            |
| a / b / c, Å                                  | 13.388(3) / 20.097(4) / 16.261(3)                                  |
| α / β / γ, deg                                | 90.00 / 107.65(3) / 90.00                                          |
| V, Å <sup>3</sup>                             | 4169.1(15)                                                         |
| Z                                             | 4                                                                  |
| T, K                                          | 150(2)                                                             |
| ρ <sub>calc</sub> , g/cm <sup>3</sup>         | 1.529                                                              |
| F(000)                                        | 1952                                                               |
| μ, mm <sup>-1</sup>                           | 0.187                                                              |
| crystal size, mm <sup>3</sup>                 | 0.32 x 0.21 x 0.19                                                 |
| θ range, deg                                  | 1.66-27.48                                                         |
| index ranges                                  | -17 ≤ h ≤ 17, -26 ≤ k ≤ 14, -21 ≤ l ≤ 21                           |
| max. and min. transmission                    | 0.9654 and 0.9427                                                  |
| reflections collected                         | 9439                                                               |
| independent reflections                       | 8017 [R(int) = 0.0205]                                             |
| completeness to theta = 27.48°                | 98.7 %                                                             |
| absorption correction                         | Multi-scan                                                         |
| refinement method                             | Full-matrix least-squares on F <sup>2</sup>                        |
| data/restraints/parameters                    | 9439/0/595                                                         |
| GoF                                           | 1.204                                                              |
| final R indices [I > 2σ(I)]                   | R1 = 0.0562, wR2 = 0.1540                                          |
| R indices (all data)                          | R1 = 0.0716, wR2 = 0.1806                                          |
| largest diff. peak and hole, e/Å <sup>3</sup> | 0.502 and -0.503                                                   |

**Table S8.** Data collection and structure refinement details for **7-Ph<sub>2</sub>I**.

|                                                       |                                                               |
|-------------------------------------------------------|---------------------------------------------------------------|
| formula                                               | C <sub>30</sub> H <sub>11</sub> BF <sub>15</sub> I            |
| formula weight                                        | 794.10                                                        |
| color                                                 | colorless                                                     |
| crystal system                                        | monoclinic                                                    |
| space group                                           | <i>C2/c</i>                                                   |
| radiation wavelength, Å                               | 0.71073                                                       |
| <i>a</i> / <i>b</i> / <i>c</i> , Å                    | 28.2437(7) / 10.4776(3) / 18.8072(4)                          |
| $\alpha$ / $\beta$ / $\gamma$ , deg                   | 90.00 / 93.5440(14) / 90.00                                   |
| <i>V</i> , Å <sup>3</sup>                             | 5554.9(2)                                                     |
| <i>Z</i>                                              | 8                                                             |
| <i>T</i> , K                                          | 173(2)                                                        |
| $\rho_{\text{calc}}$ , g/cm <sup>3</sup>              | 1.899                                                         |
| <i>F</i> (000)                                        | 3072                                                          |
| $\mu$ , mm <sup>-1</sup>                              | 1.276                                                         |
| crystal size, mm <sup>3</sup>                         | 0.20 x 0.18 x 0.14                                            |
| $\theta$ range, deg                                   | 2.53-27.49                                                    |
| index ranges                                          | -36 ≤ <i>h</i> ≤ 36, -12 ≤ <i>k</i> ≤ 13, -24 ≤ <i>l</i> ≤ 24 |
| max. and min. transmission                            | 0.8416 and 0.7844                                             |
| reflections collected                                 | 6348                                                          |
| independent reflections                               | 5299 [R(int) = 0.0330]                                        |
| completeness to $\theta = 27.49^\circ$                | 99.4 %                                                        |
| absorption correction                                 | Multi-scan                                                    |
| refinement method                                     | Full-matrix least-squares on <i>F</i> <sup>2</sup>            |
| data/restrains/parameters                             | 6348/0/427                                                    |
| GoF                                                   | 1.119                                                         |
| final R indices [ <i>I</i> > 2 $\sigma$ ( <i>I</i> )] | R1 = 0.0442, wR2 = 0.0891                                     |
| R indices (all data)                                  | R1 = 0.0568, wR2 = 0.0967                                     |
| largest diff. peak and hole, e/Å <sup>3</sup>         | 0.476 and -0.523                                              |

## References

---

- 1 B. J. Burger and J. E. Bercaw, *Experimental Organometallic Chemistry*; American Chemical Society: Washington, D.C., 1987.
- 2 A. B. Pangborn, M. A. Giardello, R. H. Grubbs, R. K. Rosen and F. J. Timmers, *Organometallics* 1996, **15**, 1518.
- 3 R. K. Harris and B. E. Mann, Eds., *NMR and the Periodic Table*; Academic Press: New York, 1978.
- 4 A. Y. Khalimon, W. E. Piers, J. M. Blackwell, D. J. Mickalak and M. Parvez, *J. Am. Chem. Soc.* 2012, **134**, 9601.
- 5 A. R. Kennedy, R. E. Mulvey, D. E. Oliver and S. D. Robertson, *Dalton Trans.* 2010, **39**, 6190.
- 6 W. E. Piers, A. J. V. Marwitz and L.G. Mercier, *Inorg. Chem.* 2011, **50**, 12252.
- 7 A. Berkefeld, W. E. Piers and M. Parvez, *J. Am. Chem. Soc.*, 2010, **132**, 10660.
